# Supplementary material for: Site-selective and inducible acylation of thrombin using aptamer-catalyst conjugates
Source: Royal Society of Chemistry journal article supplement (doi:10.1039/d1cc05446e), 2021-01-01
Supplement: d1cc05446e2.xlsx [file d1cc05446e2.xlsx]

## Sheet: TBA-DMAP constructs
TBA-DMAP constructs
Table of Scores									Table of PEP values									Table of Localization probabilities
AA	Residues	DMAP	TBA3-DMAP	TBA4-DMAP	TBA7-DMAP	TBA12-DMAP	TBA13-DMAP		AA	Residues	DMAP	TBA3-DMAP	TBA4-DMAP	TBA7-DMAP	TBA12-DMAP	TBA13-DMAP		AA	Residues	DMAP	TBA3-DMAP	TBA4-DMAP	TBA7-DMAP	TBA12-DMAP	TBA13-DMAP
K	21		316.12	290.71					K	21		3.48207e-112	1.36711e-112					K	21		1	1
K	77					333.15	317.77		K	77					9.7078e-10	2.33714e-05		K	77					1	1
K	83	226.29	207.6	257.4	190.57	183.03	257.4		K	83	1.64532e-57	5.05313e-19	4.67762e-46	0.00245711	3.56679e-13	1.9207e-45		K	83	1	0.999996	1	0.998011	0.999999	1
K	106		170.53	165.3		307.7	252.73		K	106		1.32487e-25	7.84497e-18		6.38302e-72	1.73334e-59		K	106		1	0.999987		1	1
K	107		251.05			311.33	336.06		K	107		3.28251e-53			1.71216e-79	2.1376e-131		K	107		1			1	1
K	145	269.88	314.71	388.46	294.95	196.74	135.08		K	145	1.21406e-66	4.34228e-113	2.10965e-95	5.56111e-44	1.10264e-95	1.11613e-11		K	145	1	1	1	1	1	1
K	154		153.12		166.39				K	154		4.77955e-60		1.40193e-28				K	154		1		1
K	196	124.62	118.24	111.77	123.14	127.78	113.88		K	196	3.0101e-36	2.77004e-12	2.85016e-08	1.59074e-08	9.80211e-09	4.47008e-18		K	196	0.999772	0.996514	0.998209	0.979143	0.993408	0.99951
K	236	150.06	127.17	113.77	97.85	120.57	119.39		K	236	1.43029e-07	3.6684e-07	3.6684e-07	0.000811277	3.46144e-06	2.85016e-08		K	236	0.998762	0.999242	0.999242	0.99263	0.998389	0.99949
K	248								K	248								K	248
K	252	177.3	155.84	174.48	144.66	170.69	169.09		K	252	7.4923e-13	1.40253e-09	8.18525e-09	2.55086e-13	1.3794e-06	1.40949e-13		K	252	1	1	1	1	1	1
K(LC)	18					151.45	100.79		K(LC)	18					6.5256e-18	0.000121122		K(LC)	18					1	1
K(LC)	23	111.28	118.69	98.24	118.69	118.69	124.89		K(LC)	23	7.74236e-28	2.21669e-74	1.40193e-28	3.69657e-60	7.95842e-37	1.06627e-36		K(LC)	23	1	1	1	0.999973	1	1
Explanation:
Score roughly signifies the intensity of each found modification. It gives some indication towards which modification is found more often (e.g. 300 is likely found more than 100), but is not conclusive evidence and can thus only serve as an estimate.
PEP is the posterior error probability. It is a percentage score of the program's chance to be incorrect. If a modification has this number above 0.01, it is removed, because the chance this finding being incorrect is 1% or higher and is thus not reliable.
Localization probability is the chance of the modification being on a particular amino acid. In general, this value is 1 or slightly below. In our results, this value is 0.5 for S22, because the program has difficulty assessing whether the modification is on S22 or on K21, since they are both on the same peptide fragment.

## Sheet: TBA-PyOx & TBA-diPyOx pH 7
TBA-PyOx & TBA-diPyOx pH 7
Table of Scores								Table of PEP values								Table of Localization probabilities
AA	Residues	PyOx	TBA3-PyOx	TBA12-PyOx	TBA3-diPyOx	TBA12-diPyOx		AA	Residues	PyOx	TBA3-PyOx	TBA12-PyOx	TBA3-diPyOx	TBA12-diPyOx		AA	Residues	PyOx	TBA3-PyOx	TBA12-PyOx	TBA3-diPyOx	TBA12-diPyOx
S	5				326.81			S	5				9.7e-135			S	5				1
K	21		238.06	306.14	184.21	263.9		K	21		9.3202e-37	8.528e-71	7.21e-32	4.59628e-57		K	21		0.999332	0.999072	1	1
S	22		194.48	148.9	184.21	169.52		S	22		1.16285e-33	2.7167e-21	7.21e-32	1.885e-17		S	22		0.5	0.5	0.5	0.5
K	77		128.87	104.22		155.06		K	77		0.000981463	9.77673e-05		0.000173288		K	77		0.999963	0.998964		0.999995
K	83		151.07	171.62				K	83		4.43086e-08	4.36793e-12				K	83		1	1
K	106		144.01	126.22	143.57			K	106		1.16274e-15	1.63075e-11	2.2e-13			K	106		0.998167	1	1
K	107	144.68	173.46	213.84	206.96	323.59		K	107	3.5148e-15	9.40007e-21	1.06704e-45	2.1e-54	3.14468e-76		K	107	1	1	1	1	1
K	145	218.45	355.13	369.8	217.2	231.74		K	145	4.64699e-27	8.62524e-107	1.0629e-124	1.74e-50	2.54132e-39		K	145	1	1	1	1	1
K	154		214.19	249.09		312.21		K	154		3.33798e-57	4.00028e-70		9.33788e-102		K	154		0.999917	0.999848		1
S	158		185.32	248.67	142.39	277.94		S	158		4.69165e-22	3.20915e-53	4.74e-24	1.33136e-78		S	158		1	1	1	1
K	196				106.03	233.25		K	196				1.41e-09	0.00724752		K	196				0.984351	0.979024
K(LC)	18					100.15		K(LC)	18					0.00668451		K(LC)	18					0.982001
K(LC)	23				105.65	179.53		K(LC)	23				2.91e-05	2.96259e-13		K(LC)	23				1	1
Explanation:
Score roughly signifies the intensity of each found modification. It gives some indication towards which modification is found more often (e.g. 300 is likely found more than 100), but is not conclusive evidence and can thus only serve as an estimate.
PEP is the posterior error probability. It is a percentage score of the program's chance to be incorrect. If a modification has this number above 0.01, it is removed, because the chance this finding being incorrect is 1% or higher and is thus not reliable.
Localization probability is the chance of the modification being on a particular amino acid. In general, this value is 1 or slightly below. In our results, this value is 0.5 for S22, because the program has difficulty assessing whether the modification is on S22 or on K21, since they are both on the same peptide fragment.

## Sheet: TBA-PyOx & TBA-diPyOx pH 8
TBA-PyOx & TBA-diPyOx pH 8
Table of Scores							Table of PEP values							Table of Localization probabilities
AA	Residues	PyOx	TBA3-PyOx	TBA12-PyOx	TBA12-diPyOx		AA	Residues	PyOx	TBA3-PyOx	TBA12-PyOx	TBA12-diPyOx		AA	Residues	PyOx	TBA3-PyOx	TBA12-PyOx	TBA12-diPyOx
K	21		183.96	142.85	259.68		K	21		1.42331e-09	3.95121e-09	8.00812e-46		K	21		0.820014	0.844209	1
S	22		97.579	105.28			S	22		8.06301e-05	0.00028126			S	22		0.5	0.5
K	77	169.4	115.06	88.496	176.41		K	77	3.32338e-09	0.00214928	0.00301825	1.1065e-09		K	77	0.999997	1	0.999255	0.999997
K	83		117.23	88.441			K	83		0.000258611	0.00695357			K	83		0.999767	0.999995
K	106		168.27	140.97	262.36		K	106		4.97994e-13	6.65967e-08	1.01239e-40		K	106		0.999842	0.997531	1
K	107	114.55	197.47	126.19	281.65		K	107	4.45645e-06	1.46843e-27	3.50629e-06	4.58253e-71		K	107	0.982098	1	0.999996	1
K	145	97.579	260.5	119.39	301.59		K	145	0.000176778	1.32708e-27	0.000412848	1.03196e-75		K	145	0.986858	1	1	1
K	154		299.97	184.03	324.12		K	154		1.21209e-74	3.94473e-27	1.72096e-118		K	154		0.999995	0.976063	1
S	158		137.44	124.35	255.16		S	158		2.46331e-10	3.32877e-10	7.07762e-65		S	158		1	1	1
K	196				196.48		K	196				7.32421e-18		K	196				1
K(LC)	18		115.84	103.7	90.15		K(LC)	18		1.85469e-08	4.78222e-07	0.00292172		K(LC)	18		0.999995	1	0.997408
K(LC)	23				179.53		K(LC)	23				3.65848e-09		K(LC)	23				1
Explanation:
Score roughly signifies the intensity of each found modification. It gives some indication towards which modification is found more often (e.g. 300 is likely found more than 100), but is not conclusive evidence and can thus only serve as an estimate.
PEP is the posterior error probability. It is a percentage score of the program's chance to be incorrect. If a modification has this number above 0.01, it is removed, because the chance this finding being incorrect is 1% or higher and is thus not reliable.
Localization probability is the chance of the modification being on a particular amino acid. In general, this value is 1 or slightly below. In our results, this value is 0.5 for S22, because the program has difficulty assessing whether the modification is on S22 or on K21, since they are both on the same peptide fragment.

## Sheet: TBA2-diPyOx
TBA2-diPyOx pH 7
Table of Scores									Table of PEP values									Table of Localization probabilities
AA	Residues	diPyOx	TBA2-5'end	TBA2-5	TBA2-17	TBA2-23	TBA2-26		AA	Residues	diPyOx	TBA2-5'end	TBA2-5	TBA2-17	TBA2-23	TBA2-26		AA	Residues	diPyOx	TBA2-5'end	TBA2-5	TBA2-17	TBA2-23	TBA2-26
K	21			232.53	157.82				K	21			1.54e-62	2.91e-23				K	21			0.840294	0.961765
K	77	150.15	135.55	132.32	175.41	139.43	123.79		K	77	1.76e-18	0.00121985	0.00166171	1.63e-18	2.12e-05	2.84e-08		K	77	1	0.999552	0.999626	1	0.999817	0.999359
K	83			150.68	245.08		163.9		K	83			3.41e-08	1.27e-55		6.96e-17		K	83			1	1		1
K	104				166.89				K	104				0.00346214				K	104				0.757509
K	106				144.88		142.91		K	106				2.37e-27		0.00285512		K	106				0.999986		0.5
K	107			102.793	133.93		142.91		K	107			2.81e-05	7.91e-19		0.00285512		K	107			0.999559	1		0.5
K	135		153.14			127.37			K	135		0.00152649			2.37e-07			K	135		0.798918			0.999891
K	145	189.4	270.45	100.38	166.45	182.89	237.07		K	145	3.42e-40	1.43e-92	0.00319159	4.6e-24	8.19e-32	1.81e-63		K	145	1	1	0.999926	1	1	1
K	174		110.6	110.6		130.63	171.74		K	174		1.23e-11	1.65e-11		8.39e-11	1.13e-07		K	174		0.988512	0.713895		0.781141	0.996125
K	236		101.8			106.91	142.89		K	236		1.69e-05			0.000401622	6.55e-11		K	236		x			1	1
K	247			95.793			98.98		K	247			0.00960871			0.0039059		K	247			0.999999			1
K	248			95.793			98.98		K	248			0.00960871			0.0039059		K	248			0.999999			1
K	252			100.84	96.93		135.94		K	252			0.000575932	0.000481192		0.00281438		K	252			1	1		1
S	22			114.63	126.63				S	22			2.02e-12	5.96e-13				S	22			0.5	0.5
S	128					83.71			S	128					0.00128066			S	128					1
S(LC)	19					175.75	202.72		S(LC)	19					2.65161e-14	7.49145e-33		S(LC)	19					1	1
S(LC)	31		148.59			159.36			S(LC)	31		6.54652e-07			1.26165e-13			S(LC)	31		0.793953			0.999999
Explanation:
Score roughly signifies the intensity of each found modification. It gives some indication towards which modification is found more often (e.g. 300 is likely found more than 100), but is not conclusive evidence and can thus only serve as an estimate.
PEP is the posterior error probability. It is a percentage score of the program's chance to be incorrect. If a modification has this number above 0.01, it is removed, because the chance this finding being incorrect is 1% or higher and is thus not reliable.
Localization probability is the chance of the modification being on a particular amino acid. In general, this value is 1 or slightly below. In our results, this value is 0.5 for S22, because the program has difficulty assessing whether the modification is on S22 or on K21, since they are both on the same peptide fragment.
